# Supplementary material
Source: MDPI journal article supplement (https://www.mdpi.com/2073-4441/13/22/3227)
Supplement: s1 [file s1]

## **Iron, Phosphorus and Trace Elements in Mussels' Shells, Water, and Bottom Sediments from the Severnaya Dvina and the Onega River Basins (Northwestern Russia)**

**Artem A. Lyubas , Alena A. Tomilova, Artem V. Chupakov, Ilya V. Vikhrev, Oksana V. Travina, Aleksandr S. Orlov, Natalia A. Zubrii, Aleksandr V. Kondakov, Ivan N. Bolotov, Oleg S. Pokrovsky**

### **INDEX**

Page 2      Figure S1: The power relationships between Fe and P concentrations in *A. anatina* (1) and *Unio* spp. (2) shells; Figure S2: The power relationships between Al and Mg concentrations in *A. anatina* (1) and *Unio* spp. (2) shells; Figure S3: The power relationships between Al and K concentrations in *A. anatina* (1) and *Unio* spp. (2) shells; Figure S4: The power relationships between Fe and Y concentrations in *A. anatina* (1) and *Unio* spp. (2) shells.

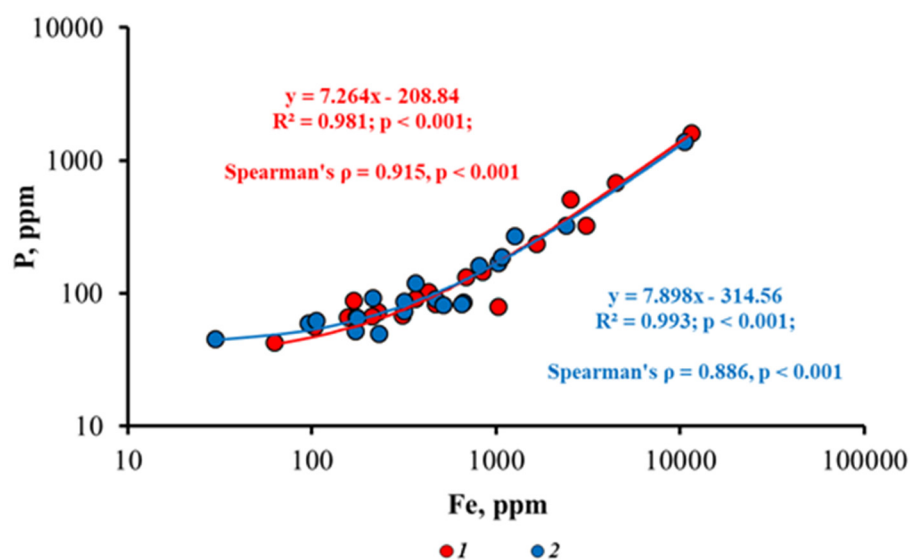

**Figure S1.** The power relationships between Fe and P concentrations in *A. anatina* (1) and *Unio* spp. (2) shells

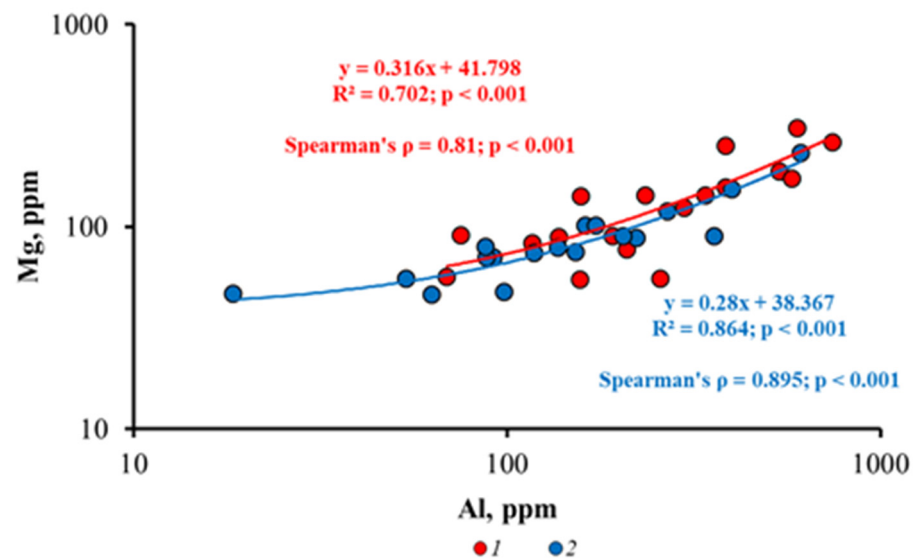

**Figure S2.** The power relationships between Al and Mg concentrations in *A. anatina* (1) and *Unio* spp. (2) shells

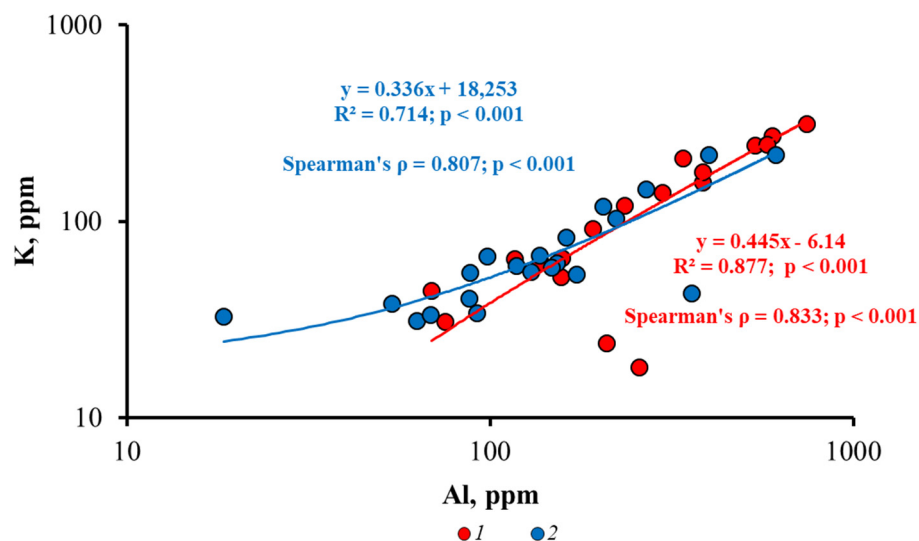

**Figure S3.** The power relationships between Al and K concentrations in *A. anatina* (1) and *Unio* spp. (2) shells

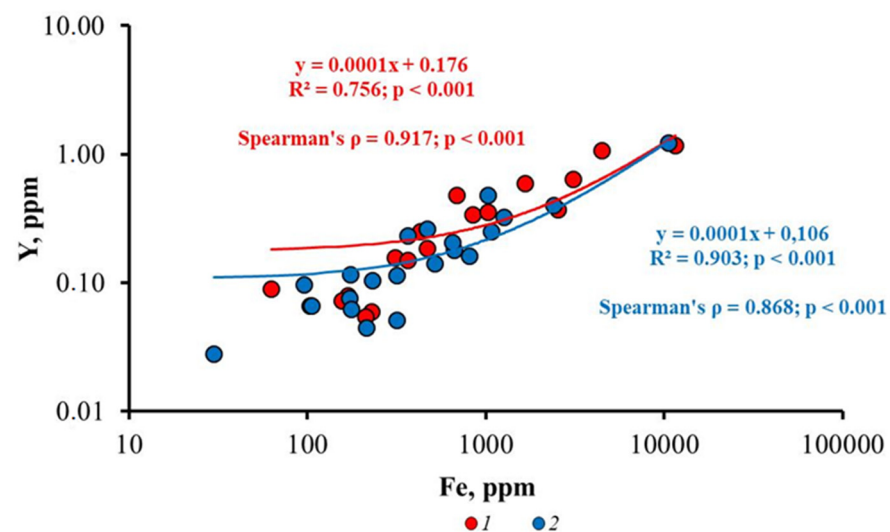

**Figure S4.** The power relationships between Fe and Y concentrations in *A. anatina* (1) and *Unio* spp. (2) shells
